# Supplementary material for: Integration of Gene Dosage and Gene Expression in Non-Small Cell Lung Cancer, Identification of HSP90 as Potential Target
Source: PubMed Central journal article supplement (PMC2254495; doi:10.1371/journal.pone.0001722), 2008-03-05
Supplement: pone.0001722.s001.pdf [file pone.0001722.s001.pdf]

**Supplementary Table S1: Genes identified by ACE-it (359) ordered according to their relation with survival (Univariate cox regression analysis)**

| ID    | Gene          | Chromosome | Start     | End       | Clone     | Gene name | ACE-it      |             | Univariate Cox regression |             |
|-------|---------------|------------|-----------|-----------|-----------|-----------|-------------|-------------|---------------------------|-------------|
|       |               |            |           |           |           |           | Raw p-value | Adj p-value | Raw p-value               | Adj p-value |
| 8984  | BC032907      | 5          | 10405817  | 10406728  | BC032907  |           | 0.001207    | 0.021651    | 0.003407233               | 0.80291037  |
| 9076  | NM_016180     | 5          | 33980476  | 34020607  | NM_016180 | SLC45A2   | 0.000581    | 0.014974    | 0.005470466               | 0.80291037  |
| 9118  | BC032711      | 5          | 36912618  | 37100061  | BC009608  | NIPBL     | 0.001968    | 0.030332    | 0.010061377               | 0.80291037  |
| 9178  | U09410        | 5          | 43157626  | 43212050  | NM_018038 |           | 0.004104    | 0.045148    | 0.017059899               | 0.80291037  |
| 9117  | NM_015384     | 5          | 36912618  | 37100061  | BC009608  | NIPBL     | 0.004916    | 0.049385    | 0.020917942               | 0.80291037  |
| 9156  | I_958346      | 5          | 40861121  | 40865014  | NM_000997 | RPL37     | 0.001207    | 0.021651    | 0.024471588               | 0.80291037  |
| 7121  | I_928694      | 3          | 161699072 | 161701137 | AK055675  |           | 0.000277    | 0.010568    | 0.026681546               | 0.80291037  |
| 9125  | NM_018034     | 5          | 37415071  | 37788535  | AK022353  | WDR70     | 0.004916    | 0.049385    | 0.028352189               | 0.80291037  |
| 7442  | NM_153690     | 3          | 195889757 | 195889816 | NM_153690 | FAM43A    | 0.002964    | 0.037767    | 0.03058387                | 0.80291037  |
| 9001  | BC035585      | 5          | 14323828  | 14561785  | AK023551  |           | 0.004104    | 0.045148    | 0.034076938               | 0.80291037  |
| 8956  | THC1570157    | 5          | 5491079   | 5491578   | BC004902  |           | 0.000986    | 0.018905    | 0.034085862               | 0.80291037  |
| 6908  | NM_006153     | 3          | 138063770 | 138150670 | AK021677  | NCK1      | 0.000655    | 0.015855    | 0.037417616               | 0.80291037  |
| 7103  | NM_024996     | 3          | 159844914 | 159893141 | NM_020169 | GFM1      | 0.002386    | 0.033738    | 0.042916755               | 0.80291037  |
| 9065  | NM_006713     | 5          | 32621429  | 32637821  | NM_006713 | SUB1      | 0.004633    | 0.047867    | 0.043110532               | 0.80291037  |
| 6979  | NM_004267     | 3          | 144320871 | 144324927 | AK097380  | CHST2     | 0.000178    | 0.008665    | 0.045467411               | 0.80291037  |
| 9158  | NM_000997     | 5          | 40866375  | 40870455  | NM_000997 | RPL37     | 0.003941    | 0.043729    | 0.048220053               | 0.80291037  |
| 9090  | AK001962      | 5          | 34951572  | 34961542  | NM_133377 | BXDC2     | 0.001114    | 0.020501    | 0.048424286               | 0.80291037  |
| 22961 | NM_005348     | 14         | 101617145 | 101623135 | NM_005348 | HSP90AA1  | 0.004917    | 0.049385    | 0.049117965               | 0.80291037  |
| 7122  | NM_002268     | 3          | 161700644 | 161766078 | AY077740  | KPNA4     | 6.20E-05    | 0.005471    | 0.052006702               | 0.80291037  |
| 7073  | NM_020865     | 3          | 155476151 | 155524988 | NM_020865 | DHX36     | 0.000115    | 0.007278    | 0.05558956                | 0.80291037  |
| 9089  | NM_018321     | 5          | 34951227  | 34961857  | NM_133377 | BXDC2     | 0.001264    | 0.022344    | 0.057362309               | 0.80291037  |
| 6866  | NM_032169     | 3          | 133778495 | 133778554 | NM_032169 | ACAD11    | 6.60E-05    | 0.005471    | 0.057585245               | 0.80291037  |
| 7214  | AK023267      | 3          | 173951210 | 174021974 | AF085992  | ECT2      | 0.000125    | 0.00775     | 0.070261095               | 0.80291037  |
| 6884  | NM_021203     | 3          | 135007306 | 135022314 | NM_016577 | SRPRB     | 8.20E-05    | 0.005789    | 0.070669664               | 0.80291037  |
| 6956  | NM_001679     | 3          | 143078168 | 143128080 | NM_001679 | ATP1B3    | 3.00E-06    | 0.00208     | 0.077140471               | 0.80291037  |
| 6957  | BU625774      | 3          | 143078168 | 143128080 | NM_001679 | ATP1B3    | 3.00E-06    | 0.00208     | 0.079933706               | 0.80291037  |
| 7352  | I_945862      | 3          | 187784398 | 187786297 | NM_016306 | DNAJB11   | 0.003702    | 0.042383    | 0.090016222               | 0.80291037  |
| 25460 | NM_022764     | 16         | 85121950  | 85146325  | NM_022764 | FLJ12998  | 0.000664    | 0.015855    | 0.092026559               | 0.80291037  |
| 6940  | BF746243      | 3          | 141139228 | 141139627 | AF052176  |           | 0.002424    | 0.033746    | 0.095895347               | 0.80291037  |
| 7318  | NM_004443     | 3          | 185762251 | 185782907 | NM_004443 | EPHB3     | 0.000581    | 0.014974    | 0.097690333               | 0.80291037  |
| 7467  | NM_005017     | 3          | 197453508 | 197502905 | NM_005017 | PCYT1A    | 0.000752    | 0.016228    | 0.100157297               | 0.80291037  |
| 9025  | NM_033414     | 5          | 16504621  | 16518910  | NM_033414 | ZNF622    | 0.000917    | 0.018362    | 0.102420132               | 0.80291037  |
| 7170  | NM_024947     | 3          | 171297360 | 171382218 | AK022455  | PHC3      | 0.000324    | 0.010812    | 0.102767371               | 0.80291037  |
| 7123  | U93240        | 3          | 161700644 | 161766078 | AY077740  | KPNA4     | 0.000155    | 0.008471    | 0.105353549               | 0.80291037  |
| 28461 | I_962019      | 19         | 12671002  | 12694104  | NM_013433 | TNPO2     | 0.000838    | 0.017357    | 0.105369                  | 0.80291037  |
| 7065  | AK026659      | 3          | 154039777 | 154041927 | AK026659  |           | 0.000942    | 0.018362    | 0.110855481               | 0.80291037  |
| 28381 | NM_023008     | 19         | 10524651  | 10537702  | NM_023008 | FLJ12949  | 0.001852    | 0.029163    | 0.114477944               | 0.80291037  |
| 7420  | BC043443      | 3          | 194793709 | 194895796 | NM_130837 | OPA1      | 0.000387    | 0.011731    | 0.114638288               | 0.80291037  |
| 9063  | AK025481      | 5          | 32390206  | 32439135  | NM_016107 | ZFR       | 0.000445    | 0.012346    | 0.116415456               | 0.80291037  |
| 7449  | I_3558062     | 3          | 196731799 | 196751283 | NM_006241 | PPP1R2    | 0.000254    | 0.010153    | 0.12107484                | 0.80291037  |
| 7146  | NM_007217     | 3          | 168884398 | 168935383 | NM_007217 | PDCD10    | 0.000724    | 0.01603     | 0.123949276               | 0.80291037  |
| 7019  | NM_016094     | 3          | 150942041 | 150942100 | NM_016094 | COMMD2    | 0.000372    | 0.01158     | 0.124959368               | 0.80291037  |
| 6852  | NM_014382     | 3          | 132095730 | 132204787 | NM_014382 | ATP2C1    | 1.30E-05    | 0.003026    | 0.127763688               | 0.80291037  |
| 28382 | NM_001800     | 19         | 10538138  | 10540631  | NM_001800 | CDKN2D    | 0.003052    | 0.038079    | 0.128668221               | 0.80291037  |
| 28347 | I_1850394     | 19         | 9580140   | 9592916   | NM_152289 | ZNF561    | 0.000245    | 0.010153    | 0.133348831               | 0.80291037  |
| 7441  | NM_018385     | 3          | 195842811 | 195874245 | NM_018385 | LSG1      | 0.004367    | 0.046409    | 0.134471137               | 0.80291037  |
| 28387 | AF141870      | 19         | 10642171  | 10661429  | NM_012218 | ILF3      | 0.003052    | 0.038079    | 0.134577185               | 0.80291037  |
| 7115  | NM_005496     | 3          | 161634283 | 161634342 | NM_005496 | SMC4L1    | 0.000181    | 0.008665    | 0.137597602               | 0.80291037  |
| 7064  | NM_002563     | 3          | 154035420 | 154038539 | NM_002563 | P2RY1     | 0.000277    | 0.010568    | 0.138154561               | 0.80291037  |
| 7124  | A_32_BS214969 | 3          | 161700644 | 161766078 | AY077740  |           | 0.000422    | 0.01229     | 0.145734415               | 0.80291037  |
| 28380 | NM_032885     | 19         | 10515566  | 10525102  | NM_032885 | ATG4D     | 0.001098    | 0.020501    | 0.153472002               | 0.80291037  |
| 28344 | NM_006631     | 19         | 9384761   | 9384820   | NM_006631 | ZNF266    | 0.001565    | 0.02588     | 0.161358859               | 0.80291037  |
| 6864  | NM_001099     | 3          | 133518976 | 133560324 | NM_001099 | ACPP      | 0.000752    | 0.016228    | 0.162812395               | 0.80291037  |
| 7472  | AK097068      | 3          | 197683975 | 197686377 | AK097068  |           | 0.000655    | 0.015855    | 0.162949619               | 0.80291037  |

|       |                 |    |           |           |           |          |          |          |             |            |
|-------|-----------------|----|-----------|-----------|-----------|----------|----------|----------|-------------|------------|
| 28396 | ENST00000324954 | 19 | 10990557  | 11030769  | NM_003072 | SMARCA4  | 0.00437  | 0.046409 | 0.164191209 | 0.80291037 |
| 7393  | NM_003722       | 3  | 190938080 | 191095193 | NM_003722 | TP73L    | 4.90E-05 | 0.005042 | 0.165245007 | 0.80291037 |
| 7478  | AK000529        | 3  | 197927514 | 197943538 | NM_017861 | PIGX     | 0.000322 | 0.010812 | 0.166186283 | 0.80291037 |
| 7398  | AF115546        | 3  | 191506765 | 191522966 | NM_021101 | CLDN1    | 0.00162  | 0.026081 | 0.170783    | 0.80291037 |
| 6854  | AK074692        | 3  | 132096132 | 132218260 | NM_014382 | ATP2C1   | 2.20E-05 | 0.003587 | 0.176028836 | 0.80291037 |
| 7213  | NM_018098       | 3  | 173951210 | 174021974 | AF085992  | ECT2     | 0.001426 | 0.023796 | 0.177058704 | 0.80291037 |
| 7286  | NM_024871       | 3  | 185016364 | 185026120 | NM_024871 | MAP6D1   | 0.000724 | 0.01603  | 0.180939946 | 0.80291037 |
| 6977  | BC006474        | 3  | 144203171 | 144258427 | BC040051  |          | 7.00E-05 | 0.005471 | 0.186619356 | 0.80291037 |
| 7395  | I_3559341       | 3  | 191095561 | 191097771 | NM_003722 | TP73L    | 1.60E-05 | 0.003026 | 0.189199733 | 0.80291037 |
| 7282  | THC1431796      | 3  | 184959382 | 184960057 | NM_018023 | YEATS2   | 0.000938 | 0.018362 | 0.194011508 | 0.80291037 |
| 16298 | NM_016307       | 9  | 129507473 | 129564512 | NM_016307 | PRRX2    | 0.003873 | 0.043729 | 0.195969401 | 0.80291037 |
| 7342  | U87836          | 3  | 187132250 | 187138508 | NM_004593 | SFRS10   | 0.001432 | 0.023796 | 0.198123978 | 0.80291037 |
| 7038  | Y15268          | 3  | 151941598 | 151963862 | NM_152394 | SLAH2    | 1.70E-05 | 0.003078 | 0.201102262 | 0.80291037 |
| 7479  | NM_017861       | 3  | 197927549 | 197950151 | NM_017861 | PIGX     | 0.000861 | 0.017499 | 0.202958467 | 0.80291037 |
| 30701 | NM_017896       | 20 | 61047021  | 61047080  | NM_017896 | C2orf11  | 0.001311 | 0.022947 | 0.20594529  | 0.80291037 |
| 7477  | NM_032898       | 3  | 197922231 | 197927474 | NM_032898 | C3orf34  | 0.003094 | 0.038079 | 0.20961313  | 0.80291037 |
| 28395 | NM_003072       | 19 | 10932606  | 11033953  | NM_003072 | SMARCA4  | 0.001629 | 0.026102 | 0.210021887 | 0.80291037 |
| 7116  | I_1961525       | 3  | 161635775 | 161637287 | BU172301  |          | 0.000725 | 0.01603  | 0.210237216 | 0.80291037 |
| 9109  | NM_032637       | 5  | 36187940  | 36219902  | NM_005983 | SKP2     | 0.004585 | 0.047788 | 0.210430359 | 0.80291037 |
| 28198 | NM_018708       | 19 | 4742719   | 4746582   | AI826903  | FEM1A    | 0.003143 | 0.038293 | 0.212896829 | 0.80291037 |
| 7081  | NM_003875       | 3  | 157071022 | 157138220 | NM_003875 | GMPS     | 0.000661 | 0.015855 | 0.213124018 | 0.80291037 |
| 6942  | BX097190        | 3  | 141778218 | 141778943 | AK056386  |          | 0.003488 | 0.040969 | 0.214991121 | 0.80291037 |
| 7445  | THC1598616      | 3  | 196270302 | 196473373 | NM_152531 | C3orf21  | 0.004367 | 0.046409 | 0.215237502 | 0.80291037 |
| 6945  | NM_018155       | 3  | 142143347 | 142178943 | NM_152616 | SLC25A36 | 1.30E-05 | 0.003026 | 0.217420265 | 0.80291037 |
| 7222  | NM_030921       | 3  | 178222171 | 178222230 | NM_030921 |          | 0.000697 | 0.01603  | 0.222723493 | 0.80291037 |
| 24324 | NM_152891       | 16 | 2773954   | 2776625   | NM_152891 | PRSS33   | 0.000636 | 0.015855 | 0.224394375 | 0.80291037 |
| 28167 | NM_030662       | 19 | 4041294   | 4075126   | NM_020224 | MAP2K2   | 0.000426 | 0.01229  | 0.228565475 | 0.80291037 |
| 30670 | THC1581610      | 20 | 60145337  | 60147890  | NM_152255 |          | 0.00162  | 0.026081 | 0.233552977 | 0.80291037 |
| 6853  | BC028139        | 3  | 132095868 | 132218251 | NM_014382 | ATP2C1   | 2.20E-05 | 0.003587 | 0.233589192 | 0.80291037 |
| 28126 | NM_020170       | 19 | 3136598   | 3160615   | NM_020170 | NCLN     | 0.000487 | 0.013311 | 0.237369064 | 0.80291037 |
| 6954  | BC008627        | 3  | 142939743 | 142947940 | NM_014245 | RNF7     | 3.00E-06 | 0.00208  | 0.237398136 | 0.80291037 |
| 7341  | NM_004593       | 3  | 187117238 | 187138479 | NM_004593 | SFRS10   | 0.003702 | 0.042383 | 0.239570663 | 0.80291037 |
| 7045  | THC1444068      | 3  | 152470108 | 152470607 | AF318318  |          | 0.000115 | 0.007278 | 0.239853139 | 0.80291037 |
| 7471  | AB018337        | 3  | 197570058 | 197647610 | AK092964  | UBXD7    | 0.003094 | 0.038079 | 0.241497419 | 0.80291037 |
| 6549  | AK093100        | 3  | 102929004 | 102966576 | AK022267  | PDCL3    | 3.70E-05 | 0.004288 | 0.242166262 | 0.80291037 |
| 9188  | NM_012343       | 5  | 43638573  | 43741468  | AK096668  | NNT      | 0.004144 | 0.045148 | 0.242801462 | 0.80291037 |
| 7148  | NM_014498       | 3  | 169209917 | 169296446 | AK000777  | GOLPH4   | 0.003522 | 0.040969 | 0.244263082 | 0.80291037 |
| 28450 | NM_020714       | 19 | 12552139  | 12582606  | NM_153358 | ZNF490   | 0.000445 | 0.012346 | 0.25110729  | 0.80291037 |
| 28091 | BC018621        | 19 | 2272513   | 2279600   | NM_016199 | LSM7     | 0.003941 | 0.043729 | 0.251356353 | 0.80291037 |
| 7473  | NM_152617       | 3  | 197686939 | 197718949 | BE740187  | RNF168   | 0.00274  | 0.036066 | 0.252908533 | 0.80291037 |
| 7292  | BC015334        | 3  | 185200873 | 185218429 | NM_005688 |          | 0.000724 | 0.01603  | 0.255837663 | 0.80291037 |
| 7455  | NM_005781       | 3  | 197078944 | 197079003 | NM_005781 | TNK2     | 0.000187 | 0.008665 | 0.258170157 | 0.80291037 |
| 28469 | NM_005809       | 19 | 12768603  | 12773694  | NM_002229 | PRDX2    | 2.40E-05 | 0.003622 | 0.259516812 | 0.80291037 |
| 28399 | BC014514        | 19 | 11061132  | 11105490  | NM_000527 | LDLR     | 0.002103 | 0.031336 | 0.262018261 | 0.80291037 |
| 9088  | NM_133377       | 5  | 34944049  | 34951540  | NM_133377 | RAD1     | 0.001264 | 0.022344 | 0.262409796 | 0.80291037 |
| 7363  | NM_002916       | 3  | 187990386 | 188006992 | NM_002916 | RFC4     | 0.002619 | 0.034848 | 0.263299773 | 0.80291037 |
| 7470  | THC1515738      | 3  | 197562843 | 197563799 | AB018337  | UBXD7    | 0.002424 | 0.033746 | 0.264202561 | 0.80291037 |
| 28596 | THC1494039      | 19 | 16602578  | 16631941  | NM_024104 | MGC2747  | 4.40E-05 | 0.004773 | 0.26751167  | 0.80291037 |
| 28343 | AB095928        | 19 | 9383638   | 9406980   | NM_006631 | ZNF266   | 0.002158 | 0.031376 | 0.267710235 | 0.80291037 |
| 28337 | NM_020933       | 19 | 9112056   | 9135138   | NM_020933 | ZNF317   | 3.50E-05 | 0.004288 | 0.268683778 | 0.80291037 |
| 28353 | NM_006221       | 19 | 9806880   | 9821368   | NM_006221 | PIN1     | 3.40E-05 | 0.004288 | 0.269750844 | 0.80291037 |
| 7394  | AF061512        | 3  | 190989857 | 191074066 | NM_003722 | TP73L    | 7.90E-05 | 0.00577  | 0.272812252 | 0.80291037 |
| 28470 | NM_181738       | 19 | 12768637  | 12773694  | NM_002229 | PRDX2    | 7.70E-05 | 0.00577  | 0.273609798 | 0.80291037 |
| 7335  | AK074357        | 3  | 186786713 | 186831594 | NM_021627 | SENP2    | 0.004144 | 0.045148 | 0.274489857 | 0.80291037 |
| 7447  | NM_012287       | 3  | 196480321 | 196645069 | NM_012287 | CENTB2   | 0.000935 | 0.018362 | 0.275539087 | 0.80291037 |
| 7224  | NM_024665       | 3  | 178223690 | 178397751 | AF268194  | TBL1XR1  | 0.001612 | 0.026081 | 0.27733544  | 0.80291037 |
| 7174  | NM_002740       | 3  | 171422920 | 171503920 | NM_005414 | PRKCI    | 0.002494 | 0.033808 | 0.27888811  | 0.80291037 |
| 7411  | NM_178496       | 3  | 193997304 | 194000684 | BC036194  | C3orf59  | 0.000221 | 0.009371 | 0.279342401 | 0.80291037 |
| 7260  | NM_003106       | 3  | 182912404 | 182914923 | BC013923  | SOX2     | 0.002943 | 0.037635 | 0.279510235 | 0.80291037 |
| 6880  | AK026229        | 3  | 134802100 | 134863436 | NM_007027 | TOPBP1   | 5.00E-06 | 0.002995 | 0.282060376 | 0.80291037 |
| 28245 | NM_032306       | 19 | 6323444   | 6326077   | NM_032306 | ALKBH7   | 0.000938 | 0.018362 | 0.28643524  | 0.80291037 |

|       |              |    |           |           |           |           |          |          |             |             |
|-------|--------------|----|-----------|-----------|-----------|-----------|----------|----------|-------------|-------------|
| 7034  | BC039424     | 3  | 151747246 | 151803713 | AI560242  |           | 2.40E-05 | 0.003622 | 0.287344892 | 0.80291037  |
| 6550  | AK054664     | 3  | 102980750 | 103025205 | NM_145037 | FAM55C    | 0.000614 | 0.015566 | 0.28945197  | 0.80291037  |
| 28231 | THC1555999   | 19 | 5855869   | 5865711   | NM_004058 | CAPS      | 0.001367 | 0.023135 | 0.290810563 | 0.80291037  |
| 6855  | AK027806     | 3  | 132215419 | 132228356 | NM_014065 | ASTE1     | 0.003927 | 0.043729 | 0.291143652 | 0.80291037  |
| 30699 | A_32_BS19917 | 20 | 61006886  | 61016130  | NM_022105 | DIDO1     | 0.00162  | 0.026081 | 0.291704381 | 0.80291037  |
| 28212 | BC029496     | 19 | 5224073   | 5237404   | NM_002850 | PTPRS     | 0.001064 | 0.020096 | 0.293628379 | 0.80291037  |
| 9110  | NM_153013    | 5  | 36228745  | 36278015  | BC033402  | FLJ30596  | 0.001612 | 0.026081 | 0.294554583 | 0.80291037  |
| 7067  | THC1417289   | 3  | 154363631 | 154364489 | BC034800  |           | 9.90E-05 | 0.006728 | 0.294620174 | 0.80291037  |
| 28504 | NM_017721    | 19 | 13864993  | 13902699  | NM_017721 | CC2D1A    | 0.002003 | 0.030734 | 0.29959153  | 0.80291037  |
| 7021  | BC017878     | 3  | 151013150 | 151162653 | NM_007282 | RNF13     | 4.50E-05 | 0.00482  | 0.299841262 | 0.80291037  |
| 7485  | I_1100153    | 3  | 198144367 | 198147893 | NM_152699 | SENP5     | 0.002424 | 0.033746 | 0.303582443 | 0.80291037  |
| 6930  | NM_023067    | 3  | 140146123 | 140146182 | NM_023067 | FOX2      | 0.000433 | 0.01229  | 0.305101336 | 0.80291037  |
| 7227  | AF279780     | 3  | 179725959 | 179727750 | AF279780  |           | 0.001114 | 0.020501 | 0.305892782 | 0.80291037  |
| 28553 | NM_014371    | 19 | 15368989  | 15369048  | NM_014371 | AKAP8L    | 0.001008 | 0.01923  | 0.308605586 | 0.80291037  |
| 7022  | NM_007282    | 3  | 151013255 | 151162621 | NM_007282 | RNF13     | 1.40E-05 | 0.003026 | 0.309568822 | 0.80291037  |
| 7421  | NM_130837    | 3  | 194793869 | 194892618 | NM_130837 | OPA1      | 0.002327 | 0.033302 | 0.30979187  | 0.80291037  |
| 28477 | NM_004461    | 19 | 12894293  | 12905522  | NM_004461 | FARSLA    | 0.000359 | 0.011452 | 0.310588755 | 0.80291037  |
| 28616 | NM_024050    | 19 | 17281322  | 17292169  | NM_024050 | DDA1      | 0.004367 | 0.046409 | 0.311767892 | 0.80291037  |
| 7156  | NM_018657    | 3  | 170973900 | 170988034 | NM_032487 | MYNN      | 1.60E-05 | 0.003026 | 0.312115937 | 0.80291037  |
| 7242  | NM_021629    | 3  | 180599704 | 180652073 | NM_021629 | GNB4      | 0.003702 | 0.042383 | 0.315284809 | 0.80291037  |
| 7197  | AK026225     | 3  | 172988765 | 173010938 | AF318333  |           | 0.000295 | 0.010736 | 0.318086119 | 0.80291037  |
| 6946  | AL136803     | 3  | 142143347 | 142178943 | NM_152616 | SLC25A36  | 0.003488 | 0.040969 | 0.32032502  | 0.80291037  |
| 6959  | NM_006286    | 3  | 143153036 | 143230197 | NM_006286 | TFDP2     | 0.000864 | 0.017499 | 0.321396899 | 0.80291037  |
| 28361 | NM_020230    | 19 | 10082904  | 10082963  | NM_020230 | PPAN      | 0.00383  | 0.043572 | 0.32152213  | 0.80291037  |
| 28705 | NM_017660    | 19 | 19357832  | 19479060  | NM_017660 | GATAD2A   | 0.004367 | 0.046409 | 0.324490552 | 0.80291037  |
| 7290  | I_1152539    | 3  | 185120428 | 185183087 | NM_005688 | ABCC5     | 0.000487 | 0.013311 | 0.325028234 | 0.80291037  |
| 7240  | AK091332     | 3  | 180596579 | 180598815 | NM_021629 |           | 0.004633 | 0.047867 | 0.325216761 | 0.80291037  |
| 7281  | NM_018023    | 3  | 184898308 | 185013114 | NM_018023 | YEATS2    | 5.20E-05 | 0.005042 | 0.330560244 | 0.80291037  |
| 7033  | NM_032025    | 3  | 151747213 | 151784723 | AI560242  | EIF2A     | 0.001772 | 0.028154 | 0.330738388 | 0.80291037  |
| 7066  | NM_002886    | 3  | 154362708 | 154364173 | BC034800  | RAP2B     | 0.002547 | 0.034405 | 0.331573522 | 0.80291037  |
| 6878  | NM_017548    | 3  | 134775183 | 134791810 | NM_017548 | CDV3      | 0.000495 | 0.013433 | 0.335910814 | 0.80291037  |
| 6937  | NM_178177    | 3  | 140761717 | 140879538 | NM_025093 | NMNAT3    | 0.000178 | 0.008665 | 0.337465211 | 0.80291037  |
| 28394 | NM_138358    | 19 | 10900397  | 10905102  | NM_138358 | LOC90580  | 0.000146 | 0.008207 | 0.338510447 | 0.80291037  |
| 7068  | I_928480     | 3  | 154364171 | 154367654 | BC034800  |           | 0.000422 | 0.01229  | 0.338660708 | 0.80291037  |
| 7308  | NM_002808    | 3  | 185500798 | 185500857 | NM_002808 | PSMD2     | 0.000214 | 0.009371 | 0.340865729 | 0.80291037  |
| 7334  | NM_021627    | 3  | 186786713 | 186831594 | NM_021627 | SENP2     | 0.000757 | 0.016253 | 0.344400542 | 0.80291037  |
| 7184  | AL110170     | 3  | 172066750 | 172070772 | AL110170  | RPL22L1   | 5.90E-05 | 0.005471 | 0.34567335  | 0.80291037  |
| 7490  | NM_138487    | 3  | 198157804 | 198159194 | NM_138487 |           | 0.00274  | 0.036066 | 0.347508344 | 0.80291037  |
| 6966  | NM_001184    | 3  | 143650449 | 143780349 | AK022009  | ATR       | 0.000131 | 0.008008 | 0.349352121 | 0.80291037  |
| 7444  | AK075551     | 3  | 196270302 | 196473373 | NM_152531 | C3orf21   | 0.001227 | 0.021911 | 0.350127798 | 0.80291037  |
| 7036  | NM_016275    | 3  | 151803764 | 151828452 | NM_016275 | SELT      | 0.000725 | 0.01603  | 0.351595564 | 0.80291037  |
| 25448 | BC039013     | 16 | 84390692  | 84398144  | NM_001861 | COX4I1    | 0.002065 | 0.031292 | 0.352979223 | 0.80291037  |
| 28334 | NM_144693    | 19 | 8781372   | 8794565   | NM_144693 | ZNF558    | 0.002484 | 0.033808 | 0.353944737 | 0.80291037  |
| 6934  | NM_004766    | 3  | 140559125 | 140591159 | NM_004766 | COPB2     | 0.000751 | 0.016228 | 0.362183114 | 0.80291037  |
| 7397  | NM_021101    | 3  | 191506765 | 191522966 | NM_021101 | CLDN1     | 0.004633 | 0.047867 | 0.362355854 | 0.80291037  |
| 28463 | NM_024038    | 19 | 12702444  | 12706589  | NM_024038 | MGC2803   | 0.00031  | 0.010812 | 0.365242585 | 0.80291037  |
| 28530 | NM_138501    | 19 | 14535850  | 14535909  | NM_138501 | GPSN2     | 0.000209 | 0.009371 | 0.367266904 | 0.80291037  |
| 14997 | NM_016623    | 8  | 130922890 | 131021182 | BG215708  | FAM49B    | 0.000532 | 0.014223 | 0.3688312   | 0.80291037  |
| 6900  | NM_018133    | 3  | 137351174 | 137351233 | NM_018133 | MSL2L1    | 2.90E-05 | 0.003858 | 0.368990292 | 0.80291037  |
| 28471 | NM_006397    | 19 | 12779241  | 12779300  | NM_006397 | RNASEH2A  | 0.001046 | 0.019847 | 0.369025658 | 0.80291037  |
| 7261  | BC013923     | 3  | 182912404 | 182914923 | BC013923  |           | 0.002327 | 0.033302 | 0.372353208 | 0.80526989  |
| 28378 | NM_012289    | 19 | 10457765  | 10474481  | NM_012289 | KEAP1     | 0.002699 | 0.035786 | 0.375950561 | 0.806733696 |
| 28349 | NM_017856    | 19 | 9624293   | 9646736   | NM_017856 | ZNF562    | 0.000725 | 0.01603  | 0.377524404 | 0.806733696 |
| 7289  | NM_005688    | 3  | 185120419 | 185218411 | NM_005688 | ABCC5     | 0.000372 | 0.01158  | 0.385454187 | 0.813074702 |
| 28348 | NM_152289    | 19 | 9580140   | 9592916   | NM_152289 | ZNF561    | 2.60E-05 | 0.003622 | 0.386534628 | 0.813074702 |
| 6879  | BC007338     | 3  | 134775518 | 134788884 | NM_017548 | CDV3      | 7.00E-05 | 0.005471 | 0.389491606 | 0.813074702 |
| 28308 | AK096659     | 19 | 7929458   | 7933376   | NM_006351 | ELAVL1    | 1.30E-05 | 0.003026 | 0.389551111 | 0.813074702 |
| 28114 | NM_173480    | 19 | 2851896   | 2869467   | BC028974  | LOC126295 | 0.001207 | 0.021651 | 0.396826481 | 0.823472293 |
| 6886  | AK055102     | 3  | 135025774 | 135030312 | NM_016577 | RAB6B     | 0.001283 | 0.022574 | 0.409025385 | 0.837824509 |
| 28430 | NM_152357    | 19 | 11786099  | 11807424  | AK021474  | ZNF440    | 0.002135 | 0.031376 | 0.411520943 | 0.837824509 |
| 28153 | NM_172251    | 19 | 3713671   | 3718568   | NM_172251 | MRPL54    | 0.003143 | 0.038293 | 0.418058309 | 0.837824509 |

|       |                 |    |           |           |           |          |          |          |             |             |
|-------|-----------------|----|-----------|-----------|-----------|----------|----------|----------|-------------|-------------|
| 28042 | NM_152482       | 19 | 1424203   | 1430158   | NM_152482 | C19orf25 | 0.001207 | 0.021651 | 0.423264253 | 0.837824509 |
| 6980  | I_1971042       | 3  | 144466754 | 144895544 | BC035779  |          | 0.000278 | 0.010568 | 0.425397389 | 0.837824509 |
| 30681 | BC018140        | 20 | 60395553  | 60396978  | AK057740  | RPS21    | 0.000337 | 0.010953 | 0.426211832 | 0.837824509 |
| 28010 | NM_002085       | 19 | 1054963   | 1057793   | NM_002085 | GPX4     | 0.003941 | 0.043729 | 0.429684146 | 0.837824509 |
| 7350  | NM_018138       | 3  | 187746832 | 187767831 | NM_018138 | TBCCD1   | 0.000862 | 0.017499 | 0.433855277 | 0.837824509 |
| 7231  | NM_006218       | 3  | 180399304 | 180435197 | NM_006218 | PIK3CA   | 2.60E-05 | 0.003622 | 0.434319577 | 0.837824509 |
| 31094 | I_3590203       | 21 | 44387576  | 44390032  | NM_004649 | C21orf33 | 0.003927 | 0.043729 | 0.436324811 | 0.837824509 |
| 7456  | ENST00000316664 | 3  | 197083404 | 197107763 | NM_005781 | TNK2     | 0.000613 | 0.015566 | 0.436832551 | 0.837824509 |
| 7475  | NM_182627       | 3  | 197769335 | 197783771 | NM_032891 | WDR53    | 0.003488 | 0.040969 | 0.438271024 | 0.837824509 |
| 6865  | AB014578        | 3  | 133665241 | 133740583 | AK023168  |          | 9.00E-06 | 0.002995 | 0.440200702 | 0.837824509 |
| 28036 | NM_001018       | 19 | 1389379   | 1391492   | NM_170711 | RPS15    | 0.000724 | 0.01603  | 0.441683951 | 0.837824509 |
| 28398 | NM_000527       | 19 | 11061132  | 11105490  | NM_000527 | LDLR     | 0.00437  | 0.046409 | 0.442268318 | 0.837824509 |
| 28137 | THC1562847      | 19 | 3474304   | 3474821   | BG029787  |          | 0.002494 | 0.033808 | 0.445570764 | 0.837824509 |
| 28111 | NM_152303       | 19 | 2770891   | 2786469   | NM_152303 | ZNF554   | 0.002802 | 0.036211 | 0.4457087   | 0.837824509 |
| 6952  | NM_006506       | 3  | 142688624 | 142816902 | NM_006506 | RASA2    | 9.60E-05 | 0.006651 | 0.445750644 | 0.837824509 |
| 6947  | AL049246        | 3  | 142171517 | 142181475 | NM_152616 | SLC25A36 | 1.30E-05 | 0.003026 | 0.450746571 | 0.842802183 |
| 7438  | NM_138399       | 3  | 195812948 | 195813007 | NM_138399 | TMEM44   | 0.00078  | 0.016647 | 0.454639436 | 0.845651388 |
| 6891  | BC021700        | 3  | 135359145 | 135424067 | AL133627  |          | 9.00E-06 | 0.002995 | 0.458798466 | 0.845651388 |
| 6905  | NM_005862       | 3  | 137537674 | 137832838 | AF251189  | STAG1    | 3.00E-06 | 0.00208  | 0.466670564 | 0.845651388 |
| 28181 | NM_003025       | 19 | 4311358   | 4351574   | NM_003025 | SH3GL1   | 0.004404 | 0.046409 | 0.47025983  | 0.845651388 |
| 28423 | NM_032377       | 19 | 11524858  | 11531032  | BC039523  | ELOF1    | 7.00E-06 | 0.002995 | 0.470702418 | 0.845651388 |
| 6890  | AL133627        | 3  | 135354185 | 135355696 | AL133627  |          | 0.000655 | 0.015855 | 0.471721628 | 0.845651388 |
| 28116 | I_1854559       | 19 | 2884209   | 2895941   | AL365370  | ZNF77    | 0.002802 | 0.036211 | 0.47316269  | 0.845651388 |
| 28531 | NM_004146       | 19 | 14537866  | 14543890  | NM_138501 | NDUFB7   | 0.000752 | 0.016228 | 0.477607013 | 0.845651388 |
| 24289 | NM_004424       | 16 | 2213567   | 2225752   | NM_004424 | E4F1     | 0.004585 | 0.047788 | 0.479943904 | 0.845651388 |
| 28467 | NM_013312       | 19 | 12733872  | 12747357  | NM_013312 | HOOK2    | 0.002103 | 0.031336 | 0.480180374 | 0.845651388 |
| 7403  | AF029213        | 3  | 191714593 | 191849260 | AF116662  |          | 0.000981 | 0.018905 | 0.481398489 | 0.845651388 |
| 28366 | NM_015956       | 19 | 10223640  | 10231736  | NM_146388 | MRPL4    | 0.000107 | 0.007036 | 0.482619341 | 0.845651388 |
| 7256  | AF075028        | 3  | 182181996 | 182183240 | AF075028  |          | 0.004144 | 0.045148 | 0.484144927 | 0.845651388 |
| 7069  | BQ717518        | 3  | 154370613 | 154371105 | BC034800  |          | 0.000134 | 0.008032 | 0.485248429 | 0.845651388 |
| 7466  | BC042043        | 3  | 197449550 | 197502932 | NM_005017 |          | 0.00043  | 0.01229  | 0.491655548 | 0.84789921  |
| 7047  | NM_023915       | 3  | 152494572 | 152517438 | NM_023915 | GPR87    | 0.000827 | 0.017357 | 0.49214486  | 0.84789921  |
| 6851  | NM_014602       | 3  | 131880464 | 131948394 | NM_014602 | PIK3R4   | 7.00E-05 | 0.005471 | 0.493876082 | 0.84789921  |
| 6933  | NM_020191       | 3  | 140545517 | 140558683 | NM_020191 | MRPS22   | 9.00E-06 | 0.002995 | 0.501081075 | 0.84789921  |
| 28307 | NM_006351       | 19 | 7897590   | 7914656   | BC022423  | TIMM44   | 0.000293 | 0.010736 | 0.50396045  | 0.84789921  |
| 28222 | NM_015414       | 19 | 5641367   | 5642707   | NM_004793 | RPL36    | 0.004404 | 0.046409 | 0.5049455   | 0.84789921  |
| 15015 | D63477          | 8  | 132985535 | 133095071 | AK002123  | KIAA0143 | 0.001825 | 0.028867 | 0.50561491  | 0.84789921  |
| 6984  | I_951890        | 3  | 145191189 | 145193901 | BC037293  |          | 0.004414 | 0.046409 | 0.508237346 | 0.84789921  |
| 6898  | NM_002718       | 3  | 137167221 | 137348090 | NM_002718 | PPP2R3A  | 5.00E-05 | 0.005042 | 0.508440573 | 0.84789921  |
| 6951  | AK055693        | 3  | 142648014 | 142651323 | NM_152535 | ZBTB38   | 0.002424 | 0.033746 | 0.510209921 | 0.84789921  |
| 9062  | AY028703        | 5  | 32265402  | 32348832  | NM_019061 | MTMR12   | 0.002053 | 0.03123  | 0.512518464 | 0.84789921  |
| 28480 | NM_005053       | 19 | 12917654  | 12925455  | NM_005053 | RAD23A   | 0.000838 | 0.017357 | 0.515300332 | 0.848215256 |
| 6953  | AK025305        | 3  | 142688624 | 142816902 | NM_006506 |          | 0.000178 | 0.008665 | 0.51923974  | 0.848215256 |
| 7275  | AK074235        | 3  | 184453717 | 184473889 | AB020668  | B3GNT5   | 0.000193 | 0.008802 | 0.52355269  | 0.848215256 |
| 28094 | NM_012458       | 19 | 2376617   | 2378906   | NM_012458 | TIMM13   | 0.004916 | 0.049385 | 0.525492221 | 0.848215256 |
| 28498 | NM_014047       | 19 | 13746249  | 13750289  | NM_014047 | HSPC023  | 0.002124 | 0.031376 | 0.526688783 | 0.848215256 |
| 7094  | BX095281        | 3  | 158362289 | 158363051 | AV696265  |          | 0.00482  | 0.049385 | 0.527681349 | 0.848215256 |
| 28037 | I_3554426       | 19 | 1389379   | 1391492   | NM_170711 | DAZAP1   | 0.002802 | 0.036211 | 0.529248516 | 0.848215256 |
| 28537 | ENST00000248058 | 19 | 14812760  | 14813689  | NM_017506 | ORTA10   | 0.003032 | 0.038079 | 0.539748831 | 0.858812663 |
| 28122 | L40630          | 19 | 3070198   | 3072108   | NM_152294 | GNA11    | 0.004916 | 0.049385 | 0.540645298 | 0.858812663 |
| 16311 | AK023462        | 9  | 129971472 | 129973770 | NM_020960 | GPR107   | 0.00236  | 0.033501 | 0.551347778 | 0.859169314 |
| 6868  | NM_024818       | 3  | 133861786 | 133879473 | NM_024818 | UBE1DC1  | 1.30E-05 | 0.003026 | 0.553099953 | 0.859169314 |
| 7337  | NM_006548       | 3  | 186844283 | 186899183 | NM_006548 | IGF2BP2  | 0.00162  | 0.026081 | 0.553893709 | 0.859169314 |
| 28612 | NM_014173       | 19 | 17239286  | 17251144  | NM_152363 | HSPC142  | 0.00236  | 0.033501 | 0.554487198 | 0.859169314 |
| 28440 | NM_003437       | 19 | 12160408  | 12160468  | NM_003437 | ZNF136   | 0.001701 | 0.027142 | 0.555506431 | 0.859169314 |
| 28429 | BC016371        | 19 | 11786099  | 11807424  | AK021474  | ZNF440   | 0.00142  | 0.023796 | 0.557018799 | 0.859169314 |
| 30682 | NM_001024       | 20 | 60395555  | 60396970  | AK057740  | RPS21    | 0.000255 | 0.010153 | 0.559774305 | 0.859169314 |
| 28607 | AK074683        | 19 | 17187179  | 17190635  | NM_018467 | MDS032   | 0.000398 | 0.011195 | 0.560015653 | 0.859169314 |
| 28016 | NM_001687       | 19 | 1192734   | 1195904   | NM_001687 | ATP5D    | 0.001968 | 0.030332 | 0.567945722 | 0.859654139 |
| 30668 | AF165185        | 20 | 60143131  | 60143547  | NM_144703 |          | 0.002619 | 0.034848 | 0.571936002 | 0.859654139 |
| 28287 | I_2031437       | 19 | 7600678   | 7602641   | BC038715  | PCP2     | 0.000184 | 0.008665 | 0.575314302 | 0.859654139 |

|       |             |    |           |           |           |          |          |          |             |             |
|-------|-------------|----|-----------|-----------|-----------|----------|----------|----------|-------------|-------------|
| 28352 | NM_024292   | 19 | 9799592   | 9801791   | NM_024292 | UBL5     | 0.000382 | 0.011731 | 0.575841462 | 0.859654139 |
| 28210 | AK093006    | 19 | 5064893   | 5067259   | AL831872  |          | 0.004404 | 0.046409 | 0.577800143 | 0.859654139 |
| 28433 | AL136732    | 19 | 11896885  | 11922588  | AL136732  | ZNF700   | 0.002941 | 0.037635 | 0.578354181 | 0.859654139 |
| 7234  | BC020500    | 3  | 180524253 | 180536029 | NM_016331 | ZNF639   | 0.000581 | 0.014974 | 0.579387922 | 0.859654139 |
| 7223  | A_32_BS2342 | 3  | 178223690 | 178397751 | AF268194  |          | 0.002311 | 0.033302 | 0.579488305 | 0.859654139 |
| 6887  | NM_016577   | 3  | 135029996 | 135097375 | NM_016577 | RAB6B    | 0.002141 | 0.031376 | 0.585062322 | 0.864351332 |
| 9185  | AK025310    | 5  | 43481203  | 43489940  | NM_022483 | FLJ21657 | 0.003941 | 0.043729 | 0.589782527 | 0.8677538   |
| 28350 | THC1515004  | 19 | 9630974   | 9631611   | NM_017656 | ZNF562   | 0.000107 | 0.007036 | 0.597635191 | 0.870348969 |
| 7297  | BC013590    | 3  | 185344652 | 185344711 | BC013590  |          | 0.003321 | 0.039917 | 0.598624901 | 0.870348969 |
| 24308 | THC1512019  | 16 | 2527853   | 2556608   | NM_002613 | PDPK1    | 0.000724 | 0.01603  | 0.602459337 | 0.870348969 |
| 7271  | THC1573058  | 3  | 184229392 | 184230801 | NM_020166 | MCCC1    | 0.000445 | 0.012346 | 0.605772577 | 0.870348969 |
| 6919  | NM_015396   | 3  | 139497519 | 139497578 | NM_015396 | ARMC8    | 0.001203 | 0.021651 | 0.607823778 | 0.870348969 |
| 28456 | NM_013407   | 19 | 12638667  | 12654034  | NM_016145 | DHPS     | 0.002103 | 0.031336 | 0.609540801 | 0.870348969 |
| 24339 | AK091002    | 16 | 3002458   | 3004507   | NM_020982 | CLDN9    | 0.001367 | 0.023135 | 0.612140969 | 0.870348969 |
| 7338  | AW966840    | 3  | 186844283 | 186850013 | AK001051  |          | 0.000337 | 0.010953 | 0.612358229 | 0.870348969 |
| 24854 | NM_014699   | 16 | 30993258  | 31002335  | NM_014699 | ZNF646   | 0.00482  | 0.049385 | 0.613757226 | 0.870348969 |
| 6869  | NM_153240   | 3  | 133882151 | 133923974 | NM_152530 | NPHP3    | 3.60E-05 | 0.004288 | 0.615791057 | 0.870348969 |
| 7268  | AF456425    | 3  | 184144618 | 184181055 | BC013163  | DCUN1D1  | 4.30E-05 | 0.004773 | 0.618214449 | 0.870348969 |
| 28453 | THC1509243  | 19 | 12604352  | 12605659  | BU184121  |          | 0.000166 | 0.008545 | 0.630166651 | 0.881830409 |
| 7402  | NM_002182   | 3  | 191714593 | 191849260 | AF116662  | IL1RAP   | 0.003702 | 0.042383 | 0.633257347 | 0.881830409 |
| 6981  | NM_173853   | 3  | 144466754 | 144895544 | BC035779  | SLC9A9   | 0.000373 | 0.011158 | 0.633738846 | 0.881830409 |
| 28486 | NM_017722   | 19 | 13076710  | 13088437  | NM_005583 | TRMT1    | 0.003499 | 0.040969 | 0.640788295 | 0.887028911 |
| 6860  | NM_007208   | 3  | 132663726 | 132704527 | NM_007208 | MRPL3    | 0.00043  | 0.012229 | 0.644832401 | 0.887028911 |
| 7039  | THC1434456  | 3  | 152071456 | 152072040 | NM_052995 | USH3A    | 0.000942 | 0.018362 | 0.644887314 | 0.887028911 |
| 6926  | BC016050    | 3  | 139738460 | 139795880 | NM_024491 | CEP70    | 0.000153 | 0.008471 | 0.650408964 | 0.891209229 |
| 28581 | NM_014077   | 19 | 16157223  | 16163855  | NM_014077 | FAM32A   | 0.00343  | 0.04095  | 0.654322868 | 0.892056601 |
| 28005 | NM_033420   | 19 | 962132    | 972160    | NM_033420 | C19orf6  | 0.002494 | 0.033808 | 0.658172084 | 0.892056601 |
| 28293 | BC042161    | 19 | 7651760   | 7653756   | BC022836  | TRAPPC5  | 0.000426 | 0.012229 | 0.658481892 | 0.892056601 |
| 7325  | THC1581184  | 3  | 186483388 | 186493568 | BC036593  |          | 0.002943 | 0.037635 | 0.667438809 | 0.893757793 |
| 28551 | AF161369    | 19 | 15245641  | 15246558  | AK024595  |          | 0.003032 | 0.038079 | 0.668539488 | 0.893757793 |
| 28426 | I_1000433   | 19 | 11693099  | 11710810  | X51760    |          | 0.000838 | 0.017357 | 0.668966825 | 0.893757793 |
| 7303  | NM_005787   | 3  | 185442822 | 185449479 | NM_005787 | ALG3     | 0.003823 | 0.043572 | 0.669722048 | 0.893757793 |
| 7265  | BC010630    | 3  | 184036478 | 184123517 | AB023173  | ATP11B   | 0.000862 | 0.017499 | 0.6735876   | 0.893757793 |
| 28141 | NM_006339   | 19 | 3522659   | 3530079   | NM_006339 | HMG20B   | 0.000213 | 0.009371 | 0.674675103 | 0.893757793 |
| 28220 | BC009557    | 19 | 5629432   | 5631907   | AK091768  |          | 0.001968 | 0.030332 | 0.678013669 | 0.894878335 |
| 6547  | NM_024548   | 3  | 102926151 | 102972095 | AK022267  | LRR1Q2   | 0.000708 | 0.01603  | 0.682135863 | 0.895225016 |
| 28457 | NM_016145   | 19 | 12639868  | 12641449  | NM_032332 | PTD008   | 6.60E-05 | 0.005471 | 0.683263661 | 0.895225016 |
| 7055  | NM_001086   | 3  | 153014558 | 153028979 | NM_001086 | AADAC    | 0.000554 | 0.01459  | 0.688664883 | 0.8982978   |
| 6949  | NM_152282   | 3  | 142433353 | 142496444 | NM_152282 | ACPL2    | 0.000278 | 0.010568 | 0.696428608 | 0.8982978   |
| 6915  | NM_016216   | 3  | 139362913 | 139376513 | U10510    | DBR1     | 3.00E-06 | 0.00208  | 0.69942205  | 0.8982978   |
| 7245  | NM_020409   | 3  | 180788959 | 180805145 | BC021575  | MRPL47   | 6.70E-05 | 0.005471 | 0.700179485 | 0.8982978   |
| 7185  | NM_020390   | 3  | 172090923 | 172090982 | NM_020390 | EIF5A2   | 0.002155 | 0.031376 | 0.701512401 | 0.8982978   |
| 7244  | NM_178042   | 3  | 180763410 | 180788890 | NM_004301 | ACTL6A   | 0.000165 | 0.008545 | 0.702192966 | 0.8982978   |
| 28244 | I_1100823   | 19 | 6323444   | 6326077   | NM_032306 | ALKBH7   | 0.001367 | 0.023135 | 0.703124462 | 0.8982978   |
| 28555 | AK027615    | 19 | 15393771  | 15401599  | BC030281  | WIZ      | 0.004367 | 0.046409 | 0.715850883 | 0.905708113 |
| 27985 | NM_017876   | 19 | 598534    | 614227    | NM_017876 | RNF126   | 0.000724 | 0.01603  | 0.71594972  | 0.905708113 |
| 28234 | NM_003624   | 19 | 5867154   | 5908994   | NM_003624 | RANBP3   | 0.001968 | 0.030332 | 0.718283525 | 0.905708113 |
| 28053 | NM_003926   | 19 | 1527678   | 1543652   | NM_003926 | MBD3     | 0.001367 | 0.023135 | 0.720543319 | 0.905708113 |
| 7311  | NM_144635   | 3  | 185540960 | 185546768 | NM_144635 | C3orf40  | 0.003592 | 0.041652 | 0.721539053 | 0.905708113 |
| 6559  | AF283775    | 3  | 108847132 | 109007394 | NM_020235 | BBX      | 0.003032 | 0.038079 | 0.725292828 | 0.906159338 |
| 28497 | NM_032285   | 19 | 13736345  | 13746104  | NM_032285 | MGC3207  | 0.002124 | 0.031376 | 0.726946767 | 0.906159338 |
| 7278  | NM_017644   | 3  | 184836113 | 184879958 | AK024270  | KLHL24   | 0.000256 | 0.010153 | 0.741412601 | 0.920993508 |
| 7259  | BC041898    | 3  | 182764010 | 182941337 | BC013923  | SOX2OT   | 0.003303 | 0.039837 | 0.746082201 | 0.922382127 |
| 28370 | NM_080665   | 19 | 10277099  | 10287686  | NM_080665 | MGC19604 | 0.00143  | 0.023796 | 0.747669078 | 0.922382127 |
| 28174 | NM_018074   | 19 | 4198068   | 4220087   | BC007206  | FLJ10374 | 0.001367 | 0.023135 | 0.752041057 | 0.923263661 |
| 28123 | BC001528    | 19 | 3073372   | 3074994   | NM_152294 | GNA11    | 0.002802 | 0.036211 | 0.755140281 | 0.923263661 |
| 28164 | I_966199    | 19 | 3989414   | 3990383   | NM_015897 | PIASA    | 0.000324 | 0.010812 | 0.756098932 | 0.923263661 |
| 7267  | BC033880    | 3  | 184097183 | 184115093 | AB023173  | ATP11B   | 0.000221 | 0.009371 | 0.760606395 | 0.925619308 |
| 28038 | I_3549648   | 19 | 1389379   | 1391492   | NM_170711 | DAZAP1   | 0.001367 | 0.023135 | 0.767227198 | 0.927380864 |
| 28275 | THC1468550  | 19 | 7038155   | 7039455   | NM_024341 | ZNF557   | 0.002217 | 0.032106 | 0.772467016 | 0.927380864 |
| 6895  | AK023738    | 3  | 135687331 | 135776551 | NM_025180 | CEP63    | 0.003094 | 0.038079 | 0.772963659 | 0.927380864 |

|       |                 |    |           |           |           |            |          |          |             |             |
|-------|-----------------|----|-----------|-----------|-----------|------------|----------|----------|-------------|-------------|
| 7255  | THC1453312      | 3  | 182170914 | 182172048 | AF075028  |            | 0.000143 | 0.008182 | 0.774602612 | 0.927380864 |
| 7258  | NM_145261       | 3  | 182190128 | 182190187 | NM_145261 | DNAJC19    | 8.00E-06 | 0.002995 | 0.774970082 | 0.927380864 |
| 28235 | NM_007321       | 19 | 5871914   | 5884670   | NM_003624 | RANBP3     | 0.000724 | 0.01603  | 0.789025936 | 0.940084182 |
| 30697 | NM_022105       | 20 | 61006800  | 61039898  | NM_022105 | DIDO1      | 0.002619 | 0.034848 | 0.790822906 | 0.940084182 |
| 28054 | NM_006830       | 19 | 1548205   | 1556488   | NM_006830 | UQCR       | 0.002494 | 0.033808 | 0.800204559 | 0.948097151 |
| 7264  | ENST00000305540 | 3  | 184036478 | 184123517 | AB023173  | ATP11B     | 0.000664 | 0.015855 | 0.80309694  | 0.948394084 |
| 28179 | NM_032868       | 19 | 4294556   | 4311082   | NM_003025 | FLJ14981   | 0.003941 | 0.043729 | 0.807325623 | 0.950261963 |
| 30683 | ENST00000317311 | 20 | 60396105  | 60397157  | AK057740  | RPS21      | 0.000165 | 0.008545 | 0.815600651 | 0.954904286 |
| 6928  | NM_006219       | 3  | 139856229 | 140036429 | Z36836    | PIK3CB     | 0.003094 | 0.038079 | 0.817371926 | 0.954904286 |
| 28029 | NM_024407       | 19 | 1334856   | 1346602   | AK094875  | NDUFS7     | 0.000324 | 0.010812 | 0.821223978 | 0.954904286 |
| 28064 | I_1854903       | 19 | 1825877   | 1827195   | BM547883  |            | 0.002802 | 0.036211 | 0.8256912   | 0.954904286 |
| 28589 | NM_006387       | 19 | 16489687  | 16514276  | NM_006387 | CHERP      | 0.001072 | 0.020134 | 0.83115867  | 0.954904286 |
| 28391 | NM_006858       | 19 | 10804118  | 10807993  | NM_006858 | TMED1      | 0.002103 | 0.031336 | 0.833676487 | 0.954904286 |
| 7450  | I_3589590       | 3  | 196924489 | 196925549 | AW138772  |            | 0.000335 | 0.010953 | 0.833798985 | 0.954904286 |
| 7195  | AK091897        | 3  | 172853734 | 172878366 | NM_002662 |            | 0.002053 | 0.03123  | 0.834142894 | 0.954904286 |
| 28233 | NM_007322       | 19 | 5867145   | 5929157   | NM_003624 | RANBP3     | 0.000938 | 0.018362 | 0.835208762 | 0.954904286 |
| 28065 | NM_080924       | 19 | 1827979   | 1834331   | NM_031213 | FAM108A1   | 0.002494 | 0.033808 | 0.843756024 | 0.955579199 |
| 7233  | NM_171828       | 3  | 180443296 | 180467540 | NM_006218 | KCNMB3     | 0.003303 | 0.039837 | 0.844283113 | 0.955579199 |
| 6918  | AL096748        | 3  | 139465158 | 139499936 | NM_015396 | ARMC8      | 0.000655 | 0.015855 | 0.850591388 | 0.955579199 |
| 6899  | L07590          | 3  | 137167221 | 137348090 | NM_002718 | PPP2R3A    | 7.00E-05 | 0.005471 | 0.85153781  | 0.955579199 |
| 7243  | AF285120        | 3  | 180763378 | 180803431 | NM_004301 |            | 0.000981 | 0.018905 | 0.852709641 | 0.955579199 |
| 7284  | AK090720        | 3  | 185004474 | 185007080 | NM_018023 |            | 0.003143 | 0.038293 | 0.855270409 | 0.955579199 |
| 28475 | NM_013976       | 19 | 12863083  | 12872131  | NM_000159 | GCDH       | 0.000359 | 0.011452 | 0.857121672 | 0.955579199 |
| 28421 | NM_016581       | 19 | 11477732  | 11500983  | NM_016581 | SITPEC     | 0.00031  | 0.010812 | 0.862187438 | 0.955579199 |
| 6927  | NM_018147       | 3  | 139834562 | 139834621 | NM_018147 | FAIM       | 8.00E-05 | 0.00577  | 0.862348719 | 0.955579199 |
| 6950  | AK092355        | 3  | 142525754 | 142646691 | NM_024724 | ZBTB38     | 0.003488 | 0.040969 | 0.866914545 | 0.955579199 |
| 28593 | I_961604        | 19 | 16544435  | 16600042  | AK026694  |            | 0.000187 | 0.008665 | 0.867357701 | 0.955579199 |
| 7172  | AK023029        | 3  | 171349418 | 171382218 | AK022455  | PHC3       | 0.001367 | 0.023135 | 0.872921823 | 0.955579199 |
| 7238  | I_943905        | 3  | 180593215 | 180595063 | NM_021629 | GNB4       | 0.000293 | 0.010736 | 0.878383661 | 0.955579199 |
| 7247  | NM_002492       | 3  | 180805277 | 180825019 | NM_002492 | NDUFB5     | 7.90E-05 | 0.00577  | 0.880119691 | 0.955579199 |
| 28108 | NM_003021       | 19 | 2705669   | 2734354   | NM_003021 | SGTA       | 0.000324 | 0.010812 | 0.883494869 | 0.955579199 |
| 28452 | I_1000366       | 19 | 12600812  | 12602721  | NM_153358 | FLJ90396   | 0.000174 | 0.008665 | 0.88556515  | 0.955579199 |
| 28134 | NM_016263       | 19 | 3457304   | 3487194   | BG029787  | FZR1       | 0.004404 | 0.046409 | 0.885684305 | 0.955579199 |
| 7254  | X90874          | 3  | 182113154 | 182177035 | AF075028  | FXR1       | 0.000255 | 0.010153 | 0.890081919 | 0.955579199 |
| 28170 | NM_016539       | 19 | 4125104   | 4133603   | NM_016539 | SIRT6      | 0.000282 | 0.010586 | 0.8902358   | 0.955579199 |
| 7353  | NM_001622       | 3  | 187813556 | 187821820 | NM_001622 | AHSG       | 0.004144 | 0.045148 | 0.89521351  | 0.955579199 |
| 28095 | AF152351        | 19 | 2377843   | 2378589   | NM_012458 |            | 0.003522 | 0.040969 | 0.897760887 | 0.955579199 |
| 7287  | NM_018622       | 3  | 185029864 | 185085402 | NM_018622 | PARL       | 0.000138 | 0.008153 | 0.898227292 | 0.955579199 |
| 28120 | AK095154        | 19 | 3003690   | 3008126   | NM_001130 | AES        | 0.004916 | 0.049385 | 0.898286963 | 0.955579199 |
| 28008 | NM_019112       | 19 | 991116    | 1016576   | NM_019112 | ABCA7      | 0.002494 | 0.033808 | 0.899681809 | 0.955579199 |
| 28546 | I_3549137       | 19 | 15131434  | 15172794  | NM_000435 | NOTCH3     | 0.004917 | 0.049385 | 0.912129757 | 0.965942722 |
| 28316 | NM_005001       | 19 | 8282195   | 8292290   | NM_005001 | NDUFA7     | 0.000143 | 0.008182 | 0.91970768  | 0.96953262  |
| 28363 | NM_003755       | 19 | 10086699  | 10086758  | NM_003755 | EIF3S4     | 0.000617 | 0.015566 | 0.920920956 | 0.96953262  |
| 7280  | AK024270        | 3  | 184882123 | 184885009 | AK024270  | KLHL24     | 0.002599 | 0.034848 | 0.931935345 | 0.975379764 |
| 28249 | NM_002096       | 19 | 6330574   | 6344384   | NM_004158 | GTF2F1     | 0.003522 | 0.040969 | 0.93457854  | 0.975379764 |
| 28481 | NM_052850       | 19 | 12925968  | 12929050  | M77024    | GADD45GIP1 | 0.000552 | 0.01459  | 0.936541851 | 0.975379764 |
| 16406 | AK090416        | 9  | 134443382 | 134519796 | NM_002957 |            | 0.004585 | 0.047788 | 0.93734267  | 0.975379764 |
| 28615 | NM_023937       | 19 | 17277477  | 17278659  | NM_023937 | MRPL34     | 0.000814 | 0.017268 | 0.941774793 | 0.977159395 |
| 7263  | AB023173        | 3  | 184036478 | 184123517 | AB023173  | ATP11B     | 0.000255 | 0.010153 | 0.945679802 | 0.978383426 |
| 7291  | I_3562684       | 3  | 185184243 | 185218406 | NM_005688 | ABCC5      | 0.00016  | 0.008545 | 0.949708475 | 0.979727996 |
| 28066 | NM_031213       | 19 | 1827993   | 1836432   | NM_031213 | FAM108A1   | 0.000324 | 0.010812 | 0.956407735 | 0.983811968 |
| 28524 | NM_138998       | 19 | 14380633  | 14391171  | NM_078481 | DDX39      | 0.000502 | 0.013521 | 0.963006587 | 0.985861042 |
| 6863  | BC007460        | 3  | 133518949 | 133569847 | NM_001099 | ACPP       | 0.003094 | 0.038079 | 0.969219754 | 0.985861042 |
| 28451 | NM_153358       | 19 | 12582732  | 12601677  | NM_153358 | FLJ90396   | 0.001867 | 0.029268 | 0.970995431 | 0.985861042 |
| 28184 | NM_025241       | 19 | 4396261   | 4408790   | NM_025241 | UBXD1      | 0.000324 | 0.010812 | 0.971614257 | 0.985861042 |
| 7246  | A_23_BS425492   | 3  | 180789341 | 180805130 | BC021575  |            | 0.000387 | 0.011731 | 0.974707835 | 0.985861042 |
| 7320  | AB018347        | 3  | 186033253 | 186253153 | AL833838  | KIAA0804   | 0.001114 | 0.020501 | 0.975872398 | 0.985861042 |
| 7266  | AF156548        | 3  | 184036478 | 184123517 | AB023173  | ATP11B     | 0.000221 | 0.009371 | 0.977622649 | 0.985861042 |
| 7236  | NM_033540       | 3  | 180548177 | 180593786 | NM_021629 | MFN1       | 0.003303 | 0.039837 | 0.984502556 | 0.990017977 |
| 24784 | BM909113        | 16 | 29778011  | 29786782  | BM909113  |            | 0.004917 | 0.049385 | 0.987360904 | 0.990118896 |
| 15157 | AF289600        | 8  | 145496556 | 145498365 | AF289600  |            | 0.003412 | 0.04088  | 0.992574521 | 0.992574521 |
